# Supplementary material for: Identification and dissection of single seed weight QTLs by analysis of seed yield components in soybean
Source: PubMed Central journal article supplement — Breed Sci. 2018 Mar 24;68(2):177–87. doi: 10.1270/jsbbs.17098 (PMC5982185; doi:10.1270/jsbbs.17098), 2018-03-24
Supplement: 68_17098_1.pdf [file 68_17098_1.pdf]

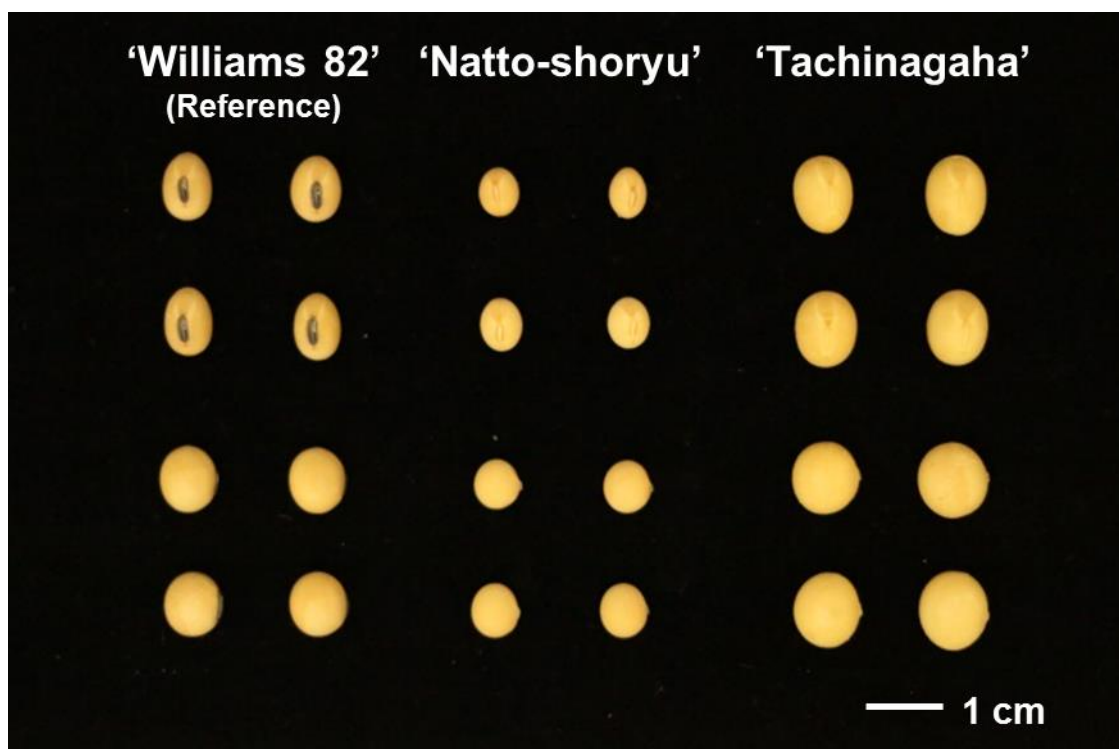

**Supplemental Fig.1.** Seed appearance in the parental cultivars of the recombinant inbred line population (NsT-RILs), 'Natto-shoryu' (small-seeded) and 'Tachinagaha' (large-seeded). Seed appearance in the cultivar 'Williams 82' is also shown as a reference for soybean size and appearance.
