# Supplementary material for: Identification and dissection of single seed weight QTLs by analysis of seed yield components in soybean
Source: PubMed Central journal article supplement — Breed Sci. 2018 Mar 24;68(2):177–87. doi: 10.1270/jsbbs.17098 (PMC5982185; doi:10.1270/jsbbs.17098), 2018-03-24
Supplement: 68_17098_3.pdf [file 68_17098_3.pdf]

**Supplemental Table 2.** DNA markers designed for determining wild-type and mutant alleles at the *E3* and *Ln* loci using a DNA sequencer

| Marker name | PCR product size (bp)   | Primer name            | Primer sequence <sup>b</sup>                                 |
|-------------|-------------------------|------------------------|--------------------------------------------------------------|
| E3          | <i>E3</i> (wild): 151   | E3-F <sup>a</sup>      | GGAGGGTATTGGATGATGC                                          |
|             | <i>e3</i> (mutant): 186 | E3-Rwild               | CCAATGTGAGAGCCTTTAGTTC                                       |
|             |                         | E3-Rmutant             | GATAAGAAAAGGAAAGAGAGACATG                                    |
| Ln          | <i>Ln</i> (wild): 130   | Ln-ls-F                | <b><u>CACGACGTTGTAAAACGAC</u></b> CTCCTTCTCTAAACCCTTTAAC     |
|             |                         | Ln-ls-R                | <b><u>CACGACGTTGTAAAACGAC</u></b> TTGGTATGATCATGAAGTTTACCTGA |
|             | <i>ln</i> (mutant): 116 | Ln-as-wild             | CCAGAACGAAACCCCTCAG                                          |
|             | Ln-as-mutant            | CATCGGGCAAATTGTTAAGGTG |                                                              |
|             | M13-primer <sup>a</sup> | CACGACGTTGTAAAACGAC    |                                                              |

<sup>a</sup> Several nucleotides with a fluorescent material were attached to the 5' end of the primer. In this study, 6-FAM was used.

<sup>b</sup> Bold-typed nucleotides with underline indicate the M13-primer sequence.

**Supplemental Table 3.** Statistical analysis of single seed weight (SSW) and other seed yield components in the NsT-RIL population and their parental cultivars under Mito and Tsukuba experimental conditions

| Trait    | Experimental condition | Parental cultivars |             | Recombinant inbred lines (NsT-RILs, $n=181$ ) |         |         |             |             |         |         |         |
|----------|------------------------|--------------------|-------------|-----------------------------------------------|---------|---------|-------------|-------------|---------|---------|---------|
|          |                        | Natto-shoryu       | Tachinagaha | ANOVA                                         |         |         | Range       | Mean        | ANOVA   |         |         |
|          |                        |                    |             | G                                             | E       | G:E     |             |             | G       | E       | G:E     |
| SSW (mg) | Mito                   | 128 ± 2            | 365 ± 5     | ***                                           | ***     | NS      | 145 — 339   | 228 ± 37    | ***     | NS      | ***     |
|          | Tsukuba                | 148 ± 17           | 400 ± 13    | (0.980)                                       | (0.010) | (0.001) | 161 — 326   | 229 ± 32    | (0.753) | (0.000) | (0.099) |
| NS       | Mito                   | 576 ± 41           | 156 ± 24    | ***                                           | NS      | NS      | 99 — 567    | 229 ± 82    | ***     | ***     | ***     |
|          | Tsukuba                | 537 ± 148          | 153 ± 28    | (0.854)                                       | (0.002) | (0.002) | 159 — 545   | 298 ± 64    | (0.497) | (0.128) | (0.101) |
| NP       | Mito                   | 330 ± 18           | 89 ± 11     | ***                                           | NS      | NS      | 56 — 286    | 143 ± 36    | ***     | ***     | ***     |
|          | Tsukuba                | 296 ± 62           | 84 ± 16     | (0.902)                                       | (0.006) | (0.003) | 79 — 258    | 153 ± 33    | (0.533) | (0.014) | (0.115) |
| NSP      | Mito                   | 1.75 ± 0.04        | 1.76 ± 0.08 | NS                                            | NS      | NS      | 0.97 — 2.08 | 1.58 ± 0.25 | ***     | ***     | ***     |
|          | Tsukuba                | 1.80 ± 0.13        | 1.82 ± 0.17 | (0.007)                                       | (0.047) | (0.001) | 1.44 — 2.56 | 1.96 ± 0.21 | (0.326) | (0.330) | (0.195) |
| NOP      | Mito                   | 2.18 ± 0.01        | 2.36 ± 0.03 | ***                                           | NS      | NS      | 1.89 — 2.70 | 2.28 ± 0.18 | ***     | ***     | ***     |
|          | Tsukuba                | 2.19 ± 0.03        | 2.33 ± 0.04 | (0.874)                                       | (0.003) | (0.009) | 2.00 — 2.79 | 2.31 ± 0.19 | (0.889) | (0.007) | (0.025) |
| RSS (%)  | Mito                   | 80.1 ± 1.7         | 74.3 ± 2.9  | NS                                            | NS      | NS      | 40.7 — 87.6 | 69.5 ± 9.4  | ***     | ***     | ***     |
|          | Tsukuba                | 82.0 ± 6.3         | 78.0 ± 7.1  | (0.156)                                       | (0.052) | (0.005) | 67.7 — 94.8 | 84.7 ± 5.1  | (0.120) | (0.423) | (0.262) |
| SY (g)   | Mito                   | 74 ± 4             | 57 ± 9      | **                                            | NS      | NS      | 22 — 110    | 51 ± 15     | ***     | ***     | ***     |
|          | Tsukuba                | 77 ± 12            | 61 ± 11     | (0.440)                                       | (0.021) | (0.000) | 43 — 98     | 67 ± 12     | (0.386) | (0.172) | (0.092) |

SSW, single seed weight; NS, number of seeds per plant; NP, number of pods per plant; NSP, number of seed per pod; NOP, number of ovules per pod; RSS, rate of seed-set; SY, seed yield per plant.

G, E, and G:E represent the genotype, experimental condition, and the interaction between genotype and experimental condition, respectively, used in ANOVA.

Trait values for each genotype group is shown as mean ± standard deviation.

\*\* and \*\*\* represent statistical significance at  $P < 0.01$  and  $0.001$ , respectively, by ANOVA; NS = not significant.

Values in parentheses indicate the effect size ( $\eta^2$ ) of each factor calculated as a proportion of the sum of squared deviation of the factor to the total sum of squared deviation.

**Supplemental Table 4.** Correlation coefficients between seed yield components in the NsT-RIL population under Mito and Tsukuba experimental conditions (additional data for Table 1)

| Trait | Experimental condition | SSW        | NS        | NP         | NSP       | NOP       | RSS       |
|-------|------------------------|------------|-----------|------------|-----------|-----------|-----------|
| NS    | Mito                   | -0.548 *** |           |            |           |           |           |
|       | Tsukuba                | -0.506 *** |           |            |           |           |           |
| NP    | Mito                   | -0.440 *** | 0.919 *** |            |           |           |           |
|       | Tsukuba                | -0.211 **  | 0.874 *** |            |           |           |           |
| NSP   | Mito                   | -0.492 *** | 0.708 *** | 0.392 ***  |           |           |           |
|       | Tsukuba                | -0.598 *** | 0.205 **  | -0.281 *** |           |           |           |
| NOP   | Mito                   | -0.396 *** | 0.275 *** | 0.076 NS   | 0.485 *** |           |           |
|       | Tsukuba                | -0.511 *** | 0.163 *   | -0.231 **  | 0.835 *** |           |           |
| RSS   | Mito                   | -0.339 *** | 0.649 *** | 0.401 ***  | 0.870 *** | -0.004 NS |           |
|       | Tsukuba                | -0.362 *** | 0.153 *   | -0.172 *   | 0.630 *** | 0.101 NS  |           |
| SY    | Mito                   | -0.071 NS  | 0.852 *** | 0.820 ***  | 0.580 *** | 0.090 NS  | 0.610 *** |
|       | Tsukuba                | 0.157 *    | 0.757 *** | 0.838 ***  | -0.199 ** | -0.199 ** | -0.066 NS |

SSW, single seed weight; NS, number of seeds per plant; NP, number of pods per plant; NSP, number of seed per pod; NOP, number of ovules per pod; RSS, rate of seed-set; SY, seed yield per plant.

\*, \*\*, and \*\*\* represent statistical significance at  $P < 0.05$ ,  $0.01$ , and  $0.001$ , respectively; NS = not significant.

**Supplemental Table 5.** Mapping of QTLs associated with single seed weight (SSW) and other seed yield components in the recombinant inbred line population derived from a cross between ‘Natto-shoryu’ and ‘Tachinagaha’ (NsT-RILs) at Mito and Tsukuba experimental conditions

| Trait               | Experimental condition <sup>a</sup> | Chromosome (Linkage group) | Position (cM) | Flanking marker | LOD score | Additive effect <sup>b</sup> | R <sup>2</sup>      | Marker interval <sup>c</sup> | Designated QTL      |  |
|---------------------|-------------------------------------|----------------------------|---------------|-----------------|-----------|------------------------------|---------------------|------------------------------|---------------------|--|
| SSW (mg)            | Mito (LOD > 3.3)                    | 12 (H)                     | 79.0          | Sat_206         | 6.2       | -12.3                        | 0.112               | Satt469 — Sat_206            | <i>qSw12-1</i>      |  |
|                     |                                     | 13 (F)                     | 34.1          | CSSR535         | 4.0       | -9.4                         | 0.064               | Sat_039 — CSSR535            | <i>qSw13-1</i>      |  |
|                     |                                     | 17 (D2)                    | 59.6          | CSSR172         | 5.1       | -10.9                        | 0.087               | Satt372 — CSSR172            | <i>qSw17-1</i>      |  |
|                     |                                     | 20 (I)                     | 75.7          | <i>Ln</i>       | 4.9       | 10.7                         | 0.083               | <i>Ln</i> — CSSR500          | <i>qSw20-1</i>      |  |
|                     | Tsukuba (LOD > 3.2)                 | 6 (C2)                     | 22.4          | Satt322         | 5.1       | -8.7                         | 0.071               | Sat_153 — Satt322            |                     |  |
|                     |                                     | 12 (H)                     | 70.3          | Satt469         | 6.9       | -10.3                        | 0.102               | GMES4012 — Satt469           | <i>qSw12-1</i>      |  |
|                     |                                     | 13 (F)                     | 34.1          | CSSR535         | 9.9       | -12.4                        | 0.148               | Sat_039 — CSSR535            | <i>qSw13-1</i>      |  |
|                     |                                     | 17 (D2)                    | 61.6          | CSSR172         | 5.7       | -8.9                         | 0.078               | Satt372 — CSSR172            | <i>qSw17-1</i>      |  |
|                     |                                     | 20 (I)                     | 79.7          | <i>Ln</i>       | 5.8       | 10.5                         | 0.108               | <i>Ln</i> — CSSR500          | <i>qSw20-1</i>      |  |
|                     |                                     |                            |               |                 |           |                              |                     |                              |                     |  |
| NS                  | Mito (LOD > 3.0)                    | 12 (H)                     | 77.0          | Sat_206         | 5.4       | 24.3                         | 0.088               | Satt469 — Sat_206            |                     |  |
|                     |                                     | 19 (L)                     | 137.9         | <i>E3</i>       | 12.9      | 42.6                         | 0.261               | Sat_286 — <i>E3</i>          |                     |  |
|                     |                                     | 20 (I)                     | 43.7          | Satt614         | 3.1       | -17.9                        | 0.046               | Satt419 — Satt614            |                     |  |
|                     | Tsukuba (LOD > 3.1)                 | 11 (B1)                    | 111.9         | Sat_123         | 5.1       | 19.6                         | 0.092               | Satt583 — Sat_123            |                     |  |
|                     |                                     | 12 (H)                     | 70.3          | Satt469         | 9.0       | 24.2                         | 0.144               | GMES4012 — Satt469           |                     |  |
|                     |                                     | 13 (F)                     | 6.0           | Sat_039         | 3.6       | 17.7                         | 0.075               | Sat_039 — CSSR535            |                     |  |
|                     |                                     | 19 (L)                     | 130.9         | Sat_286         | 5.9       | 22.6                         | 0.123               | Sat_286 — <i>E3</i>          |                     |  |
|                     | NP                                  | Mito (LOD > 3.0)           | 8 (A2)        | 138.4           | Satt209   | 3.2                          | 11.2                | 0.095                        | Satt329 — Satt209   |  |
|                     |                                     |                            | 12 (H)        | 77.0            | Sat_206   | 5.1                          | 11.5                | 0.100                        | Satt469 — Sat_206   |  |
|                     |                                     |                            | 19 (L)        | 136.9           | <i>E3</i> | 7.6                          | 15.3                | 0.172                        | Sat_286 — <i>E3</i> |  |
| Tsukuba (LOD > 3.2) |                                     | 11 (B1)                    | 94.5          | Satt583         | 3.5       | 9.9                          | 0.087               | Satt519 — Satt583            |                     |  |
|                     |                                     | 12 (H)                     | 73.0          | Satt469         | 8.0       | 11.7                         | 0.126               | Satt469 — Sat_206            |                     |  |
|                     |                                     | 19 (L)                     | 141.2         | <i>E3</i>       | 10.7      | 14.3                         | 0.181               | <i>E3</i> — Satt373          |                     |  |
| NSP                 | Mito (LOD > 3.2)                    | 19 (L)                     | 141.2         | <i>E3</i>       | 12.5      | 0.115                        | 0.202               | <i>E3</i> — Satt373          |                     |  |
|                     |                                     | 20 (I)                     | 74.7          | <i>Ln</i>       | 6.6       | -0.076                       | 0.089               | <i>Ln</i> — CSSR500          |                     |  |
|                     | Tsukuba (LOD > 3.1)                 | 13 (F)                     | 34.0          | CSSR535         | 12.4      | 0.089                        | 0.168               | Sat_039 — CSSR535            |                     |  |
|                     |                                     | 19 (L)                     | 141.2         | <i>E3</i>       | 7.5       | -0.064                       | 0.090               | <i>E3</i> — Satt373          |                     |  |
|                     |                                     | 20 (I)                     | 70.3          | <i>Ln</i>       | 14.9      | -0.104                       | 0.235               | Satt354 — <i>Ln</i>          |                     |  |
|                     |                                     |                            |               |                 |           |                              |                     |                              |                     |  |
| NOP                 | Mito (LOD > 3.3)                    | 13 (F)                     | 34.0          | CSSR535         | 22.2      | 0.0834                       | 0.218               | Sat_039 — CSSR535            |                     |  |
|                     |                                     | 20 (I)                     | 29.7          | Satt419         | 3.3       | -0.0276                      | 0.022               | Satt419 — Satt614            |                     |  |
|                     |                                     | 20 (I)                     | 74.7          | <i>Ln</i>       | 25.8      | -0.0956                      | 0.263               | <i>Ln</i> — CSSR500          |                     |  |
|                     | Tsukuba (LOD > 3.0)                 | 13 (F)                     | 34.0          | CSSR535         | 21.8      | 0.084                        | 0.188               | Sat_039 — CSSR535            |                     |  |
|                     |                                     | 20 (I)                     | 74.7          | <i>Ln</i>       | 27.6      | -0.111                       | 0.304               | <i>Ln</i> — CSSR500          |                     |  |
|                     |                                     |                            |               |                 |           |                              |                     |                              |                     |  |
| RSS (%)             | Mito (LOD > 3.1)                    | 12 (H)                     | 76.0          | Sat_206         | 4.4       | 2.43                         | 0.065               | Satt469 — Sat_206            |                     |  |
|                     |                                     | 19 (L)                     | 141.2         | <i>E3</i>       | 18.1      | 5.49                         | 0.318               | <i>E3</i> — Satt373          |                     |  |
|                     | Tsukuba (LOD > 3.1)                 | 19 (L)                     | 141.2         | <i>E3</i>       | 11.9      | -2.46                        | 0.231               | <i>E3</i> — Satt373          |                     |  |
|                     |                                     |                            |               |                 |           |                              |                     |                              |                     |  |
|                     |                                     |                            |               |                 |           |                              |                     |                              |                     |  |
|                     |                                     |                            |               |                 |           |                              |                     |                              |                     |  |
| SY (g)              | Mito (LOD > 3.1)                    | 19 (L)                     | 141.2         | <i>E3</i>       | 12.9      | 7.53                         | 0.238               | <i>E3</i> — Satt373          |                     |  |
|                     |                                     |                            |               |                 |           |                              |                     |                              |                     |  |
|                     | Tsukuba (LOD > 3.2)                 | 12 (H)                     | 64.3          | GMES4012        | 3.7       | 3.13                         | 0.064               | GMES4012 — Satt469           |                     |  |
| 19 (L)              |                                     | 141.2                      | <i>E3</i>     | 8.5             | 5.05      | 0.163                        | <i>E3</i> — Satt373 |                              |                     |  |

SSW, single seed weight; NS, number of seeds per plant; NP, number of pods per plant; NSP, number of seed per pod; NOP, number of ovules per pod; RSS, rate of seed-set; SY, seed yield per plant.

<sup>a</sup> Values in parentheses represent the LOD threshold for the QTL detection by 1000-time permutation test at  $P = 0.05$ .

<sup>b</sup> Values indicate the contribution of the ‘Natto-shoryu’ allele on the trait estimated by the composite interval mapping (CIM) method.

<sup>c</sup> Genetic marker interval for which the LOD peak was located on the linkage map.
